# Supplementary material
Source: Springer Nature journal article supplement (https://www.springermedizin.de/resource/supplementary/13058_2011_2848_MOESM16_ESM.pdf/9702724)

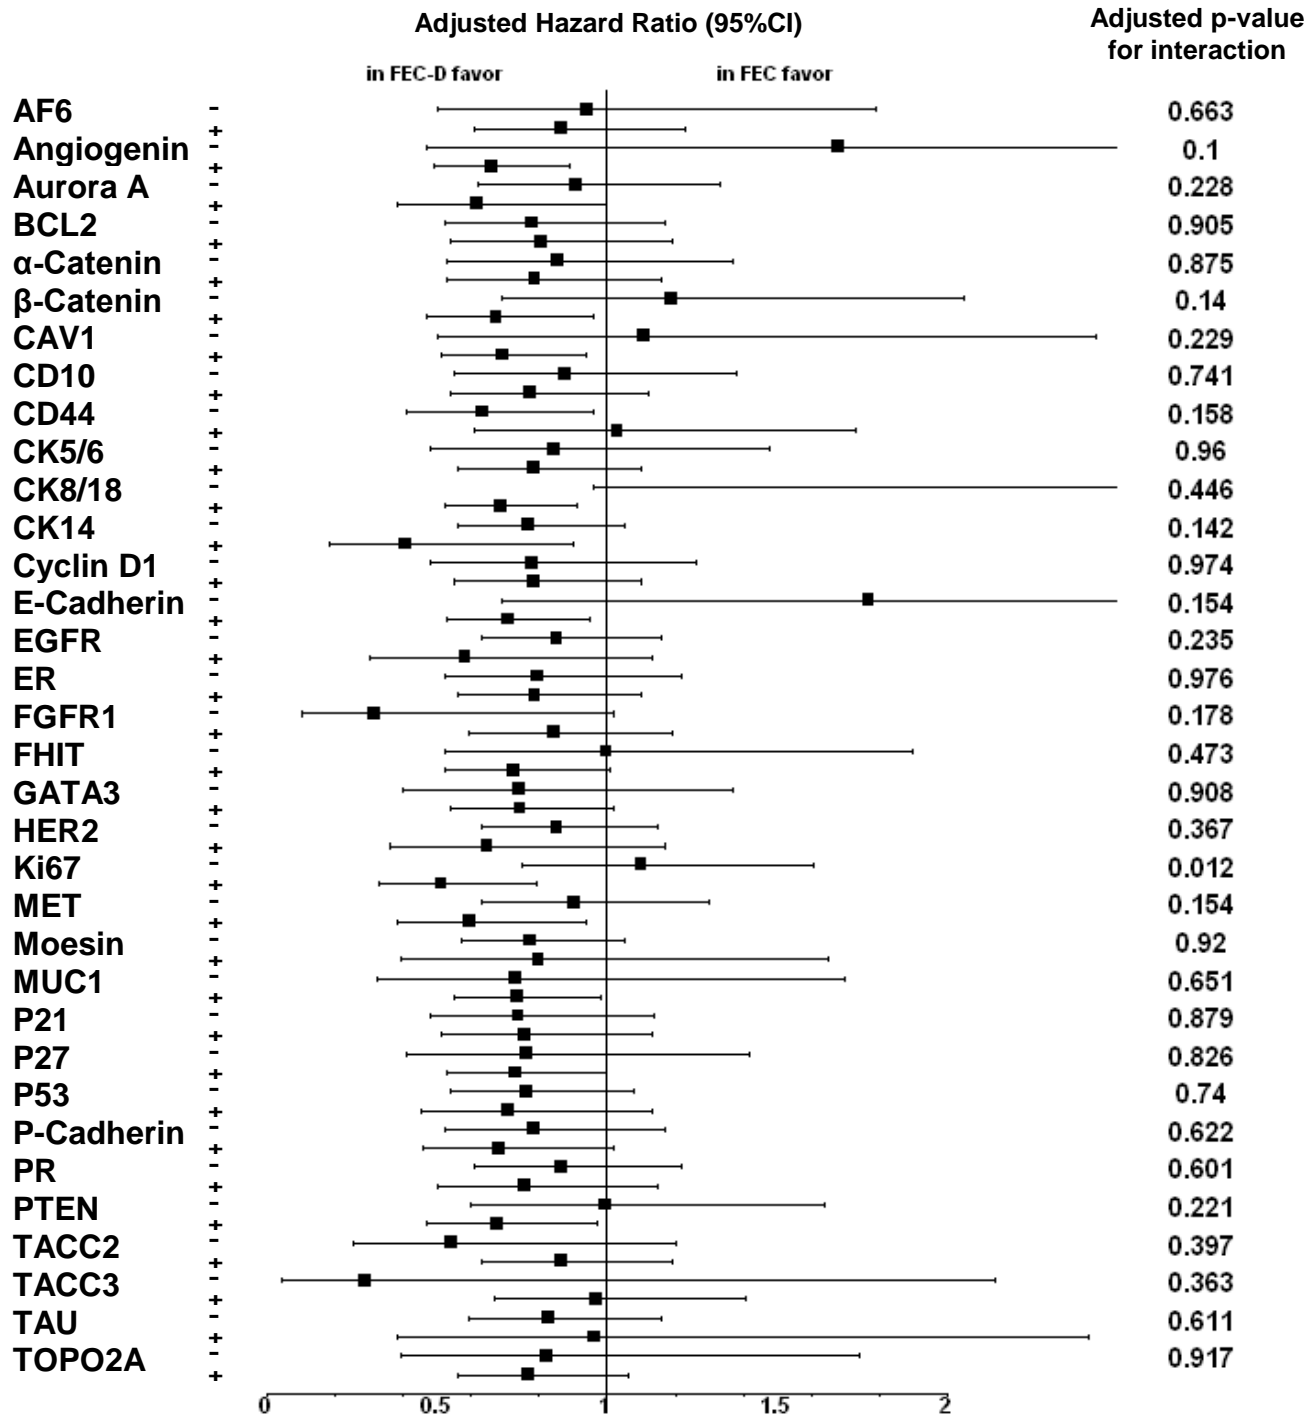

Supplement: MOESM16 [file 9702724]
